# Supplementary material for: Siglec-H protects from virus-triggered severe systemic autoimmunity
Source: PubMed Central journal article supplement — J Exp Med. 2016 Jul 25;213(8):1627–44. doi: 10.1084/jem.20160189 (PMC4986536; doi:10.1084/jem.20160189), 2016-07-25
Supplement: supp_jem.20160189_JEM_20160189_sm.pdf [file supp_jem.20160189_JEM_20160189_sm.pdf]

SUPPLEMENTAL MATERIAL

Schmitt et al., <http://www.jem.org/cgi/content/full/jem.20160189/DC1>

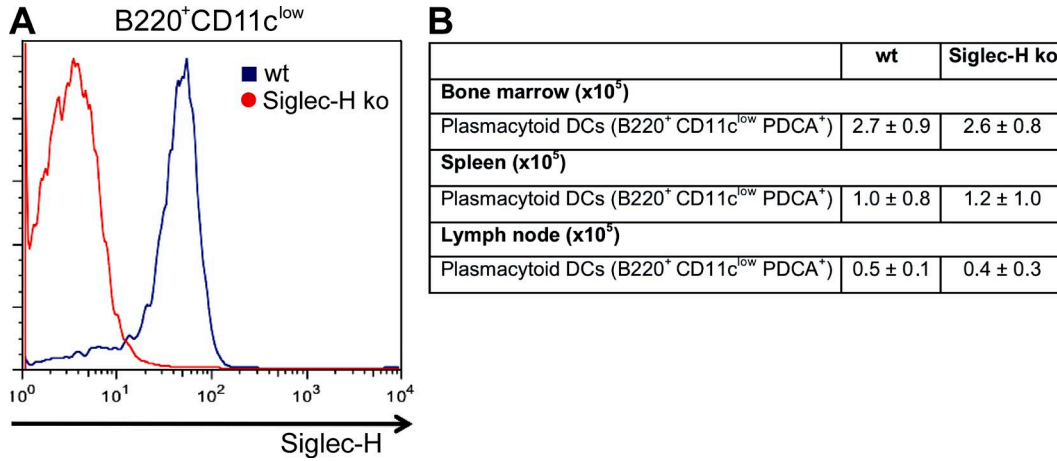

Figure S1. **pDCs from Siglec-H KO mice do not express Siglec-H on their surface.** (A) The histogram shows a representative staining by anti-Siglec-H for B220<sup>+</sup>CD11c<sup>low</sup> pDCs of WT (wt) and Siglec-H KO (ko) mice. (B) Cell numbers of pDCs from WT and Siglec-H KO mice are given as numbers ± SD. Shown is the summary of five independent experiments ( $n = 12-15$ ).
